# Supplementary material for: A supramolecular lanthanide separation approach based on multivalent cooperative enhancement of metal ion selectivity
Source: Springer Nature journal article supplement (doi:10.1038/s41467-018-02940-7), 2018-02-01
Supplement: 41467_2018_2940_MOESM3_ESM.pdf [file 41467_2018_2940_MOESM3_ESM.pdf]

## **Description of Additional Supplementary Files**

File Name: Supplementary Data 1  
Description: Crystal structure data 1

File Name: Supplementary Data 2  
Description: Crystal structure data 2
